# Supplementary material for: Design of a simple paper-based colorimetric biosensor using polydiacetylene liposomes for neomycin detection
Source: Royal Society of Chemistry journal article supplement (doi:10.1039/c8an01097h), 2018-01-01
Supplement: c8an01097h1.pdf [file c8an01097h1.pdf]

## Supplementary Information

### Design of A Simple Paper-based Colorimetric Biosensor Using Polydiacetylene Liposomes for Neomycin Detection

Do Hyun Kang,<sup>‡a</sup> Keesung Km,<sup>‡b</sup>, Younghwan Son<sup>c</sup>, Pahn-Shick Chang<sup>e</sup>, Jinsang Kim,<sup>\*ad</sup>  
and Ho-Sup Jung<sup>\*e</sup>

<sup>a</sup>Materials Science and Engineering, University of Michigan, 2300 Hayward St., Ann Arbor, MI 48109-2136, USA.

<sup>b</sup>Research Institute of Advanced Materials, Collage of Engineering, Seoul National University, 028826, South Korea

<sup>c</sup>Department of Rural Systems Engineering and Research Institute for Agriculture & Life Sciences, Seoul National University, Seoul, 08826, South Korea

<sup>d</sup>Macromolecular Science and Engineering, Chemical Engineering, Biomedical Engineering, Chemistry, and Biointerface institute, University of Michigan, Ann Arbor, MI 48109-2136, USA.

<sup>e</sup>Center for Food and Bioconvergence, Department of Food Science and Biotechnology, Seoul National University. Seoul, 08826, South Korea

CORRESPONDING AUTHOR EMAIL ADDRESS:

[jinsang@umich.edu](mailto:jinsang@umich.edu) and [jhs@snu.ac.kr](mailto:jhs@snu.ac.kr)

<sup>‡</sup> These authors are equally contributed to this work.

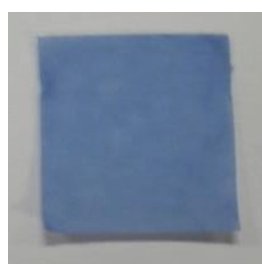

**PVA**

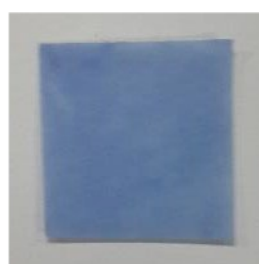

**Glycerol**

**Figure S1.** Camera image of PDA liposomes immobilized onto paper substrate with 5 wt% of PVA and Glycerol after 30 days of storage at 5 °C (Paper Size: 1 cm x 1 cm).
